# Supplementary material for: In situ SEM/EDS compositional characterization of osteocytes and blood vessels in fossil and extant turtles on untreated bone surfaces; different preservational pathways microns away
Source: PeerJ. 2020 Aug 27;8:e9833. doi: 10.7717/peerj.9833 (PMC7456530; doi:10.7717/peerj.9833)
Supplement: Supplemental Information 2 [file peerj-08-9833-s002.xlsx]

## Sheet: Sheet1
Data S2. Summary of EDS analyses. %wt, weigth percentage concentration
	Mongolemys elegans, IGM-90/42 Osteocytes embedded in bone
	Weigth Concentration
Spot	Ca	C	N	P	Fe	Mn	Si	Al
1	7.85			3.8	1.49	15.4
2	11.02			4.15		21.64
3	9.57	12.41		3.7	2.68	33.23
4	7.06	9.86	6.87	2.3	2.66	30.83
5	5.86			2.16		29.94
6	8.09			3.15		23.81
7	8.49			2.74	13.95	32.37
8	7.35	10		2.79		24.3
9	7.25			2.41	16.89	32.8
10	11.69	11.61		3.88		28.42
11	10.81	13.51		3.89		20.11
12	17.91	10.98	6.09	2.59	42.55
13	25.52	10.69		3.29	37.48
14	15.93	10.68	5.26	2.49	45.77
15	27.85	12.43		2.22	30.32
16	18.89			1.83	17.46
17	16.84			1.99	22.47
18	22.11			3.62	39.09
	Mongolemys elegans, IGM-90/42 Bone matrix
	Weigth Concentration
	Ca	C	N	P	Fe	Mn	Si	Al
1	25.81	10.89		10.17
2	29.87			11.82
3	28.43			11.08
4	36.6	12.38		8.27
5	31.54	11.38		9.88
6	29.18			11.41
7	24.28	14.77		9.26
8	25.92	15.74		9.62
9	24.06	13.42		8.71
10	38.78			2.17
11	41.66	9.79		2.42	11.27
12	34.26	15.21		1.08
13	40.88	10.22		2.08	4.75
	Mongolemys elegans, IGM-90/42 Empty osteocyte lacunae surface
	Weigth Concentration
	Ca	C	N	P	Fe	Mn	Si	Al
1	36.12			13.17
2	46.51			13.31
3	34.53			12.71
4	34.04			12.54
5	35.5			12.92
	Mongolemys elegans, IGM-90/42 surrounding rock matrix
	Weigth Concentration
	Ca	C	N	P	Fe	Mn	Si	Al
1				2.34	10.15		35.46	21.15
2					16.12	3.89	32.48	22.32
3				2.76	18.19	3.45	34.56	23.14
4				2.65	20.34	2.16	42.34	17.68
	Allaeochelys crassesculpta SMF ME 2449 Blood vessels embedded in bone
	Weigth Concentration
	Ca	C	N	P	Fe	Mn	Si	Al
1	14.11	17.77		7.62	10.96
2	8.26	18.4	14.98	5.12	1.55
3	7.53	17.95	15.94	4.43	1.33
4	9.67	26.27		6.23	2.02
5	10.25	27.13	15.46	6.58
6	3.24	48.2		2.29
7	5.27	49.36		3.38
	Allaeochelys crassesculpta SMF ME 2449 bone matrix
	Weigth Concentration
	Ca	C	N	P	Fe	Mn	Si	Al
1	20.14			10.36	15
2	24			11.49	6.24
3	21			11.2	10.1
4	26.3			12.3	9.78
	Allaeochelys crassesculpta SMF ME 2449 surrounding rock matrix
	Weigth Concentration
	Ca	C	N	P	Fe	Mn	Si	Al
1				4.32	18.66		35.67	3.42
2				4.5	19.36		32.45	8.75
3				3.25	17.85		31.89	11.36
	Podocnemidid indt. UR-CP-0043 Osteocytes embedded in bone
	Weigth Concentration
	Ca	C	N	P	Fe	Mn	Si	Al
1	8.04			4.21	25.36		4.48	6.25
2	7.17			3.76	25.59	3.08	4.86	5.91
3	6.56			3.13	26.89	4.56	4.31	5.23
4	6.78			4.56	24.72	10.15	2.15	3.54
5	10.89			5.05	19.95	9.54	3.59	10.15
	Podocnemidid indt. UR-CP-0043 blood vessels embedded in bone
	Weigth Concentration
	Ca	C	N	P	Fe	Mn	Si	Al
1	4.69	40.53	30.89	1.82
2	3.23	43.61	26.11	1.56
3	5.04	39.93	22.34	2.6				1.18
4	3.87	42.89	24.58	1.97
5	3.67	41.44	27.34	2.03
	Podocnemidid indt. UR-CP-0043 bone matrix
	Weigth Concentration
	Ca	C	N	P	Fe	Mn	Si	Al
1	27.05		3.5	19.82	2.96		2.25	2.25
2	29.11		2.65	17.32	3.01			3.25
3	35.45			15.64				3.67
4	37.56			14.92				4.35
5	38.94			19.22	4.75			9.84
	Podocnemidid indt. UR-CP-0043 surrounding rock matrix
	Weigth Concentration
	Ca	C	N	P	Fe	Mn	Si	Al
1					3.22	2.54	45.67	34.56
2					6.57	1.89	44.89	32.12
3					4.56	2.78	43.23	33.01
4					2.31		43.56	30.04
	Podocnemis lewyana. Osteocytes embedded in bone
	Weigth Concentration
	Ca	C	N	P	Fe	Mn	Si	Al
1	10.5	48.22	22.1	5.85
2	5.52	45.2	23.13	2.11
3	6.45	47.32	21.78	4.5
4	11.66	46.79	12.45	2.05
5	9.54	48.34	23.45	3.56
6	5.32	46.97	24.01	3.6
	Podocnemis lewyana. Bone matrix
	Weigth Concentration
	Ca	C	N	P	Fe	Mn	Si	Al
1	24.67	20.03	16.57	7.5
2	30.87	15.15	15.73	10.45
3	30.32	12.51	16.53	9.65
4	39.47	11.65	15.8	3.8
5	32.23	13.21	18.03	8.56
6	36.78	14.23	19.54	6.67
7	35.89	10.34	18.54	6.56
	Podocnemis lewyana. Blood vessels embedded in bone
	Weigth Concentration
	Ca	C	N	P	Fe	Mn	Si	Al
1	2.1	38.03	32.5	1.04
2	3.54	45.06	23.86	1.68
3	2.56	47.56	25.67	1.35
4	5.85	38.5	24.42	2.07
5	4.32	39.39	27.54	1.74
6	5.23	30.16	25.63	1.78
7	7.45	41.19	21.12	3.78
	Lepidochelys olivacea. Empty osteocyte lacunae surface
	Weigth Concentration
	Ca	C	N	P	Fe	Mn	Si	Al
1	45.98	14.98		13.18
2	26.85		10.24	14.63
3	21.35	10.2	10.28	9.82
	Lepidochelys olivacea. Blood vessels embedded in bone
	Weigth Concentration
	Ca	C	N	P	Fe	Mn	Si	Al
1	8.03	43.52	16.91	3.87
2	12.34	25.54	22.36	2.32
3	7.5	35.45	18.25	3.83
4	5.45	39.07	23.9	1.54
5	10.97	42.95	15.71	4.75
6	8.56	37.25	21.34	4.56
	Lepidochelys olivacea. Bone matrix
	Weigth Concentration
	Ca	C	N	P	Fe	Mn	Si	Al
1	46.58	23.38		7.93
2	34.39	16.53	19.03	3.53
3	39.02	15.47	17.81	2.37
4	35.44	17.25	17.31	4.08
5	37.5	15.47	18.39	2.77
	Gallus gallus. Ostoecytes embedded in bone
	Weigth Concentration
	Ca	C	N	P	Fe	Mn	Si	Al
1	7.32	47.54	21.34	5.34
2	5.23	46.78	23.45	3.23
3	5.45	49.78	22.34	3.45
4	6.56	47.82	19.05	4.56
	Gallus gallus. Bone matrix
	Weigth Concentration
	Ca	C	N	P	Fe	Mn	Si	Al
1	42.23	19.75	18.34	8.56
2	44.56	16.75	21.04	5.45
3	45.67	18.67	22.89	3.45
4	39.89	19.87	21.67	4.53
5	41.34	18.77	22.76	3.65
	Gallus gallus. Blood vessels embedded in bone
	Weigth Concentration
	Ca	C	N	P	Fe	Mn	Si	Al
1	4.56	44.56	18.35	3.78
2	8.62	43.71	14.56	4.78
3	6.44	42.87	19.76	3.83
4	5.88	40.24	21.24	2.18
5	9.88	42.48	16.74	4.78
6	8.78	41.34	22.77	5.67
